# Supplementary material
Source: PubMed Central journal article supplement (PMC9263026)
Supplement: 13244_2022_1255_MOESM1_ESM.pdf [file 13244_2022_1255_MOESM1_ESM.pdf]

## **ELECTRONIC SUPPLEMENTARY MATERIAL**

**CT and 18F-FDG PET abnormalities in contacts with recent tuberculosis infections but negative chest X-ray**

**Supplemental figure 1. Preferred Reporting Items for Systematic Reviews and Meta-analyses diagram of the study selection process**

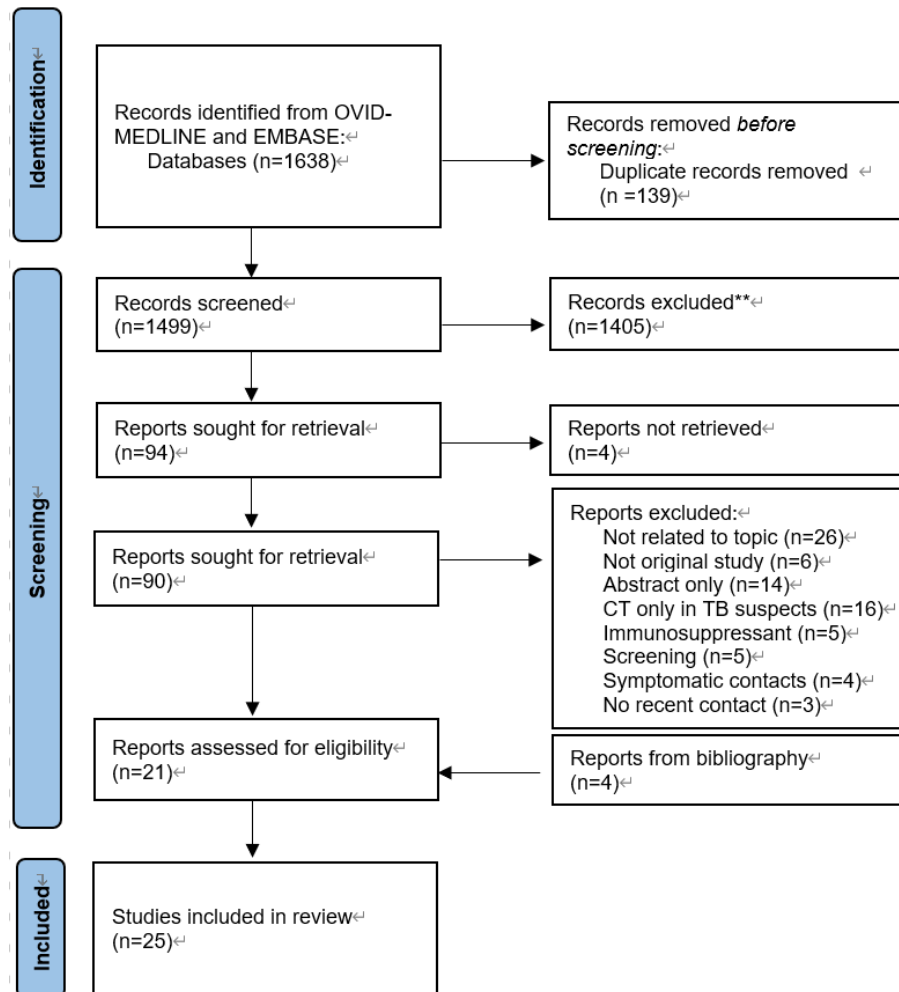

**Supplemental Table 1. Summary of definition for parenchymal and LN abnormalities in the included studies.**

| First author         | Year | Country | Definition for parenchymal abnormalities*                                                                                                                                                                                                                       | Definition for LN abnormalities*                                                                                            |
|----------------------|------|---------|-----------------------------------------------------------------------------------------------------------------------------------------------------------------------------------------------------------------------------------------------------------------|-----------------------------------------------------------------------------------------------------------------------------|
| <b>Chest CT scan</b> |      |         |                                                                                                                                                                                                                                                                 |                                                                                                                             |
| Delacourt [13]       | 1993 | France  | Not specified                                                                                                                                                                                                                                                   | mediastinal LNs <4 years, 5 mm; 4-8 years 6 mm; >8 years, 7 mm;<br>hilar LNs <4 years, 4mm; 4-8 years, 5 mm, >8 years, 6mm. |
| Duran [14]           | 1996 | Spain   | Not specified                                                                                                                                                                                                                                                   | mediastinal LNs <4 years, 5 mm; 4-8 years 6 mm; >8 years, 7 mm;<br>hilar LNs <4 years, 4mm; 4-8 years, 5 mm, >8 years, 6mm. |
| Katakura [15]        | 1999 | Japan   | Not specified                                                                                                                                                                                                                                                   | Not specified                                                                                                               |
| Baghaie [16]         | 2005 | Iran    | Not specified                                                                                                                                                                                                                                                   | Not specified                                                                                                               |
| Yoshiyama [17]       | 2008 | Japan   | Not specified                                                                                                                                                                                                                                                   | Not specified                                                                                                               |
| Lew [18]             | 2009 | Korea   | Not specified                                                                                                                                                                                                                                                   | Not specified                                                                                                               |
| Lee [19]             | 2010 | Korea   | **The presence of cavities, branching linear opacity, or multiple noncalcified nodules                                                                                                                                                                          | Not specified                                                                                                               |
| Hirama [20]††        | 2011 | Japan   | Not specified                                                                                                                                                                                                                                                   | Not specified                                                                                                               |
| Garrido [21]         | 2012 | Spain   | Not specified                                                                                                                                                                                                                                                   | Hilar or mediastinal LNs >10 mm                                                                                             |
| Fujikawa [22]        | 2014 | Japan   | **1) consolidation, 2) cavitation, 3) clusters of non-calcified nodules ≤4 mm associated with dilated or thickened peripheral airway walls,<br>4) non-calcified nodules >4 mm with adjacent small nodules,<br>5) widespread distribution of small nodules <4 mm | Not specified                                                                                                               |

|                       |      |           |                                                                                                                                                                                                                                                                                                                                                                                                                         |                                |
|-----------------------|------|-----------|-------------------------------------------------------------------------------------------------------------------------------------------------------------------------------------------------------------------------------------------------------------------------------------------------------------------------------------------------------------------------------------------------------------------------|--------------------------------|
| Catho [23] ††         | 2015 | France    | Not specified                                                                                                                                                                                                                                                                                                                                                                                                           | Not specified                  |
| Lu [24]               | 2016 | China     | Not specified                                                                                                                                                                                                                                                                                                                                                                                                           | Not specified                  |
| Ziemele [25]          | 2017 | Latvia    | Not specified                                                                                                                                                                                                                                                                                                                                                                                                           | Not specified                  |
| Lee [26] †††          | 2017 | Korea     | Not specified                                                                                                                                                                                                                                                                                                                                                                                                           | Not specified                  |
| Shimizu [27]          | 2017 | Japan     | Not specified                                                                                                                                                                                                                                                                                                                                                                                                           | Not specified                  |
| Moreno-Ballester [28] | 2018 | Spain     | Not specified                                                                                                                                                                                                                                                                                                                                                                                                           | Hilar or mediastinal LNs >5 mm |
| Yoshiyama [29]        | 2019 | Japan     | Not specified                                                                                                                                                                                                                                                                                                                                                                                                           | Not specified                  |
| Zhou [30]             | 2019 | China     | Not specified                                                                                                                                                                                                                                                                                                                                                                                                           | Not specified                  |
| Yoon [31] †††         | 2020 | Korea     | Not specified                                                                                                                                                                                                                                                                                                                                                                                                           | Not specified                  |
| Wang [32]             | 2020 | China     | Not specified                                                                                                                                                                                                                                                                                                                                                                                                           | Not specified                  |
| Mok [33]              | 2021 | Korea     | Lesions that could not be clearly classified as active or fibrocalcified TB or lesions showing a few ill-defined centrilobular nodules or a non-calcified, indeterminate nodule on CT were classified as “indeterminate lesions.” A discrete and tiny nodule of <5mm in diameter by CT were considered “normal”                                                                                                         | Not specified                  |
| <b>PET/CT scan</b>    |      |           |                                                                                                                                                                                                                                                                                                                                                                                                                         |                                |
| Ghesani [34]          | 2014 | USA       | A positive test was defined as FDG uptake greater than in the mediastinal blood pool, expressed as SUV. A true negative examination was defined as the absence of FDG uptake.                                                                                                                                                                                                                                           |                                |
| Esmail [35] ††††      | 2016 | UK        | Parenchymal lesions were categorized as infiltrates, fibrotic scars, active nodules or discrete nodules. Parenchymal lesions were considered to have abnormal if FDG uptake within lesion was > background lung parenchyma but less than that of mediastinal blood pool. Mediastinal and hilar lymph nodes was considered abnormal if FDG uptake within lesion was < that of mediastinal blood pool but < that of liver |                                |
| <b>PET/MR scan</b>    |      |           |                                                                                                                                                                                                                                                                                                                                                                                                                         |                                |
| Molton [36]           | 2019 | Singapore | A lymph node of > 1 cm in short axis was considered enlarged and a nodule > 6mm was considered significant.                                                                                                                                                                                                                                                                                                             |                                |

Insights Imaging (2022) Yoon SH, Goo JM, Yim JJ, Yoshiyama T, Flynn JL

|               |      |           |                                                                          |               |
|---------------|------|-----------|--------------------------------------------------------------------------|---------------|
|               |      |           | Any lesion with standardized uptake value > 0.95 was considered abnormal |               |
| Naftalin [37] | 2020 | Singapore | Not specified                                                            | Not specified |

LN=lymph node; CT=computed tomography; <sup>18</sup>F-FDG=18-fluorodeoxyglucose; PET=positron emission tomography; MRI=magnetic resonance imaging; SUV=Standardized uptake unit; FDG=fluorodeoxyglucose.

\*In studies without specifying definitions, the presence of subclinical abnormalities was evaluated based on radiologists interpretation

\*\*Some studies provided the definition for active tuberculosis rather than subclinical abnormalities.
